# Supplementary material for: MicroRNAs As Potential Targets for Abiotic Stress Tolerance in Plants
Source: PubMed Central journal article supplement (PMC4906921; doi:10.3389/fpls.2016.00817), 2016-06-14

# MicroRNAs as potential targets for abiotic stress tolerance in plants

Varsha Shiram<sup>1</sup>, Vinay Kumar<sup>2,\*</sup>, R. M. Devarumath<sup>3</sup>, Tushar Khare<sup>2</sup> and Shabir H. Wani<sup>4</sup>

<sup>1</sup>Department of Botany, Prof. Ramkrishna More College (Savitribai Phule Pune University), Akurdi, Pune 411044, India

<sup>2</sup>Department of Biotechnology, Modern College (Savitribai Phule Pune University), Ganeshkhind, Pune 411016, India

<sup>3</sup>Molecular Biology and Genetic Engineering Section, Vasantdada Sugar Institute, Pune 412307, India

<sup>4</sup>Division of Genetics and Plant Breeding, Faculty of Agriculture WADURA, Sher-e-Kashmir University of Agricultural Sciences and Technology, Kashmir 191121, India

\*Author for correspondence

## SUPPLEMENTARY TABLE S1 | Number of publications on miRNA in last 10 years in PubMed

| Year | Search Term |             |                            |
|------|-------------|-------------|----------------------------|
|      | miRNA       | Plant miRNA | Plant miRNA Abiotic Stress |
| 2006 | 704         | 138         | 0                          |
| 2007 | 1072        | 166         | 6                          |
| 2008 | 1741        | 220         | 11                         |
| 2009 | 2537        | 242         | 10                         |
| 2010 | 3862        | 355         | 25                         |
| 2011 | 5145        | 402         | 24                         |
| 2012 | 6722        | 512         | 39                         |
| 2013 | 8468        | 589         | 46                         |
| 2014 | 9893        | 572         | 57                         |
| 2015 | 10393       | 573         | 59                         |

## SUPPLEMENTARY Figure S1 | Number of articles on plant miRNAs and abiotic stress specific plant miRNAs in last 10 years in PubMed

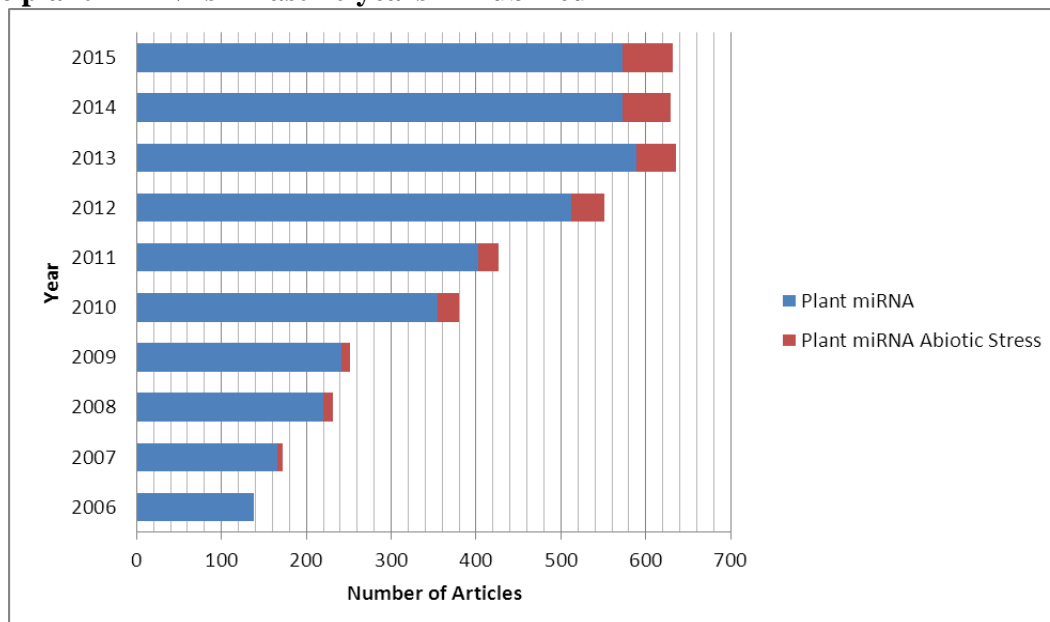

Supplement: DataSheet1.pdf [file DataSheet1.pdf]
